# Supplementary material
Source: HighWire-hosted journal article supplement (https://bmjopen.bmj.com/content/7/9/e014820)
Supplement: inline-supplementary-material-1 [file inline-supplementary-material-1.pdf]

Article:

Exercise for patients with major depression: A systematic review with meta-analysis and trial sequential-analysis

**Supplementary material (S1)**

An example of bibliographical search for PubMed

#1 Depression [MeSH]

#2 Depressive disorder [MeSH]

#3 Exercise [Text Word]

#4 Aerobic [Text Word]

#5 Non-aerobic [Text Word]

#6 Physical activity [Text Word]

#7 Physical fitness [Text Word]

#8 Walking [MeSH]

#9 Jogging [MeSH]

#10 Running [MeSH]

#11 Bicycling [MeSH]

#12 Swimming [MeSH]

#13 Strength [Text Word]

#14 Resistance [Text Word]

#15 #1 OR #2

#16 #3 OR #4 OR #5 OR #6 OR #7 OR #8 OR #9 OR #10 OR #11 OR #12 OR #13 OR #14

#17 #15 AND #16
