# Supplementary material
Source: HighWire-hosted journal article supplement (https://bmjopen.bmj.com/content/7/9/e014820)
Supplement: inline-supplementary-material-2 [file inline-supplementary-material-2.pdf]

Article:

Exercise for patients with major depression: A systematic review with meta-analysis and trial sequential-analysis

**Supplemental**

Figure S1. Flow diagram for identification of trials assessing the effects of exercise for patients with depression.

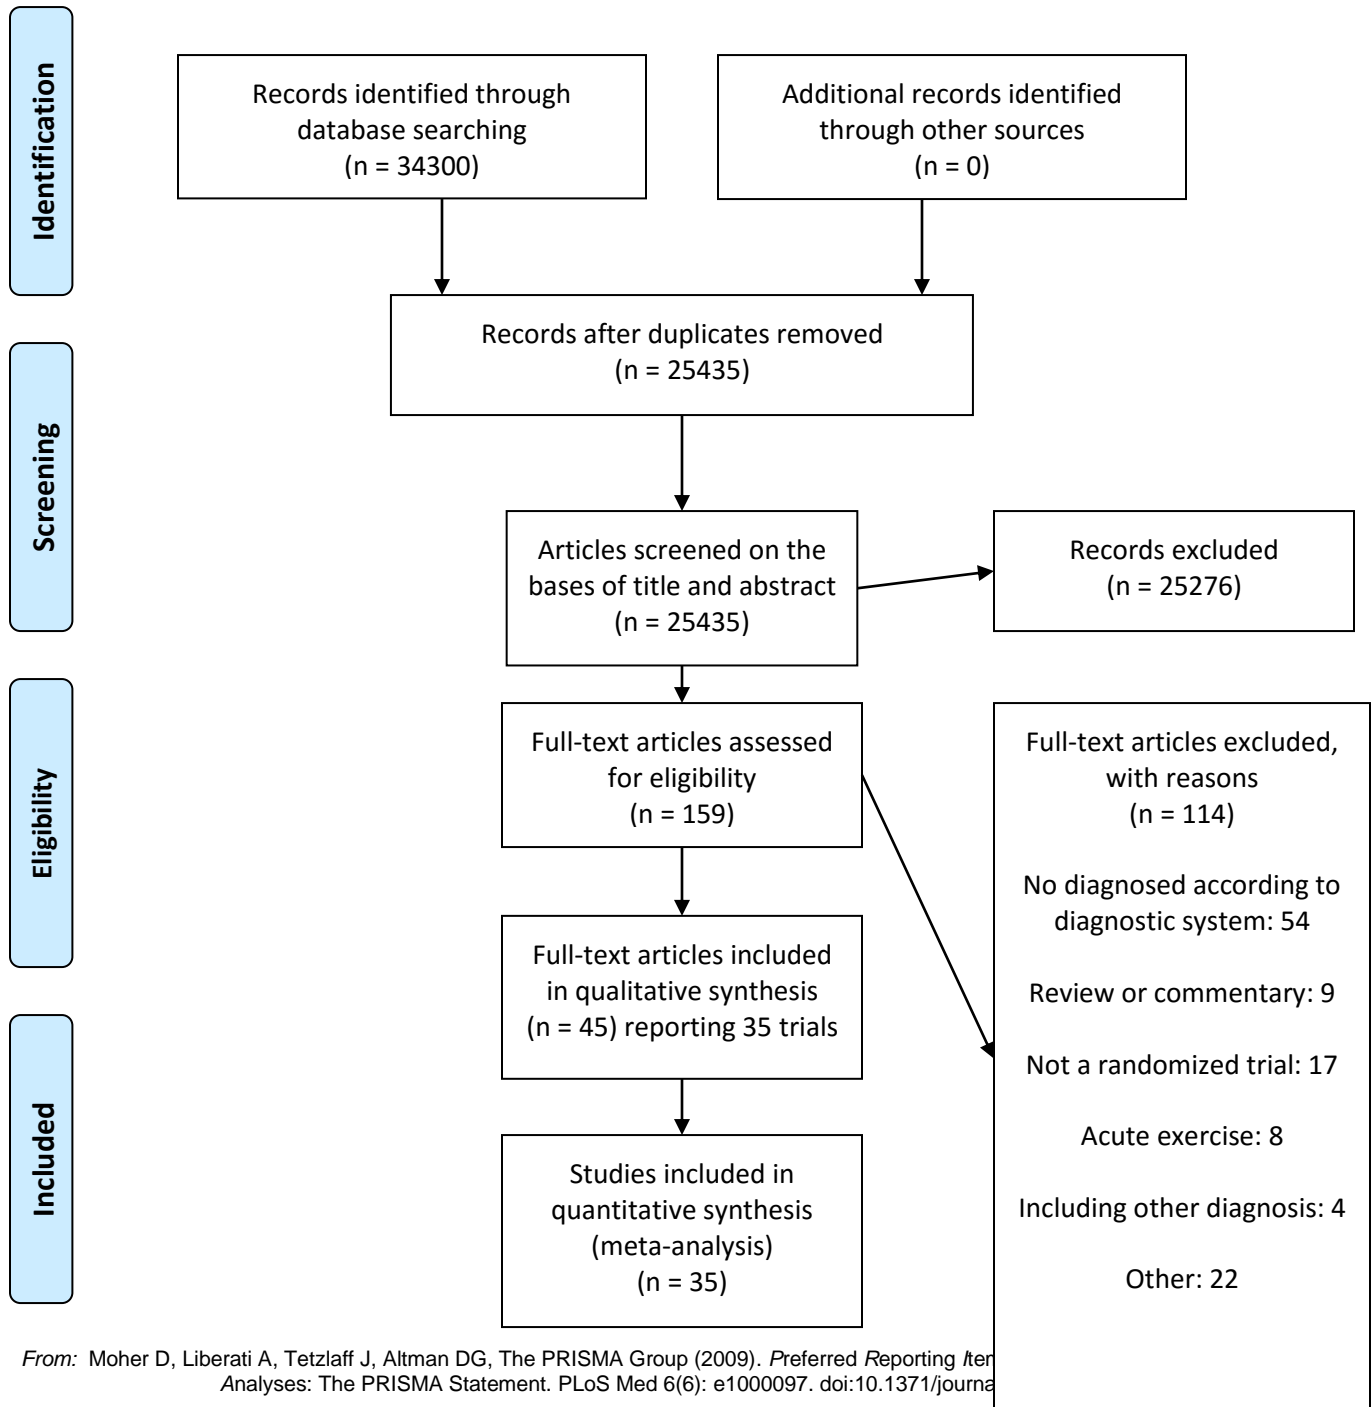

From: Moher D, Liberati A, Tetzlaff J, Altman DG, The PRISMA Group (2009). Preferred Reporting Items for Systematic Reviews and Meta-Analyses: The PRISMA Statement. PLoS Med 6(6): e1000097. doi:10.1371/journal.pmed.0060161

For more information, visit [www.prisma-statement.org](http://www.prisma-statement.org).
