# Supplementary material
Source: HighWire-hosted journal article supplement (https://bmjopen.bmj.com/content/7/9/e014820)
Supplement: inline-supplementary-material-3 [file inline-supplementary-material-3.pdf]

Article:

Exercise for patients with major depression: A systematic review with meta-analysis and trial sequential-analysis

**Supplementary Table S1**

**Table S1.** Imputation of missing data for trials assessing exercise for patients diagnosed with depression

| <b>Outcome</b>                  | <b>Result from review</b>                                 | <b>Best/worse (1SD)</b>                                    | <b>Best/worse (2SD)</b>                                    | <b>Worse/best (1SD)</b>                                    | <b>Worse/best (2SD)</b>                                    |
|---------------------------------|-----------------------------------------------------------|------------------------------------------------------------|------------------------------------------------------------|------------------------------------------------------------|------------------------------------------------------------|
| Depression SMD (95% CI)         | -0.66 (-0.86 to -0.45)<br>p < 0.001; I <sup>2</sup> = 81% | -0.77 (-1.00 to -0.54)<br>p < 0.001; I <sup>2</sup> = 86%  | -0.78 (-1.02 to -0.55)<br>p < 0.001; I <sup>2</sup> = 86%  | -0.60 (-0.81 to -0.39)<br>p < 0.001; I <sup>2</sup> = 84%  | -0.57 (-0.78 to -0.36)<br>p < 0.001; I <sup>2</sup> = 84%  |
|                                 |                                                           | <b>Good Outcome</b>                                        | <b>Poor outcome</b>                                        | <b>Good/poor outcome</b>                                   | <b>Poor/good outcome</b>                                   |
| Lack of remission (95% CL)      | RR 0.78 (0.68 to 0.90)<br>p < 0.001; I <sup>2</sup> = 69% | RR 0.75 (0.64 to 0.89)<br>p = 0.0008; I <sup>2</sup> = 73% | RR 0.88 (0.83 to 0.94)<br>p = 0.0002; I <sup>2</sup> = 69% | RR 0.71 (0.61 to 0.81)<br>p < 0.001; I <sup>2</sup> = 68%  | RR 0.86 (0.71 to 1.04)<br>p = 0.12; I <sup>2</sup> = 83%   |
| Serious adverse events (95% CL) | RR 2.21 (0.24 to 20.21)<br>p = 0.48; I <sup>2</sup> = 0%  | RR 2.19 (0.23 to 20.76)<br>p = 0.50; I <sup>2</sup> = 50%  | RR 0.92 (0.37 to 2.30)<br>p = 0.86; I <sup>2</sup> = 60%   | RR 0.08 (0.02 to 0.34)<br>p = 0.001; I <sup>2</sup> = 5.4% | RR 19.17 (2.64 to 139.2)<br>p = 0.004; I <sup>2</sup> = 0% |

Imputation of missing data for continuous outcome: 'best-worst' - assumed that all participants lost to follow-up in the intervention group had a beneficial outcome (the group mean minus 1 or 2 SD), and all participants lost to follow-up in the placebo group have had a harmful outcome (the group mean plus 1 SD and 2 SD). The reverse 'worst-best-case' scenario is the reverse of the 'best-worst' scenario.

Missing data for the 'remission' outcome was imputed according to the following scenarios: 1) poor outcome analysis: none of the drop-outs/participants lost from both arms experienced the outcome; 2) good outcome analysis: all of the drop-outs/participants lost from both arms experienced the outcome; 3) extreme case analysis favouring the experimental intervention, all of the drop-outs/participants lost from the experimental arm, but none of the drop-outs/participants lost from the control arm experienced the outcome; and 4) extreme case analysis favouring the control: all drop-outs/participants lost from the experimental arm, but none from the control arm experienced the outcome. Missing data for 'serious adverse events' was calculated with the reverse assumptions.
