# Supplementary material
Source: HighWire-hosted journal article supplement (https://bmjopen.bmj.com/content/7/9/e014820)

Article:

Exercise for patients with major depression: A systematic review with meta-analysis and trial sequential-analysis

Supplementary Figure

Figure S5. Effect of exercise on lack of remission for patients diagnosed with depression

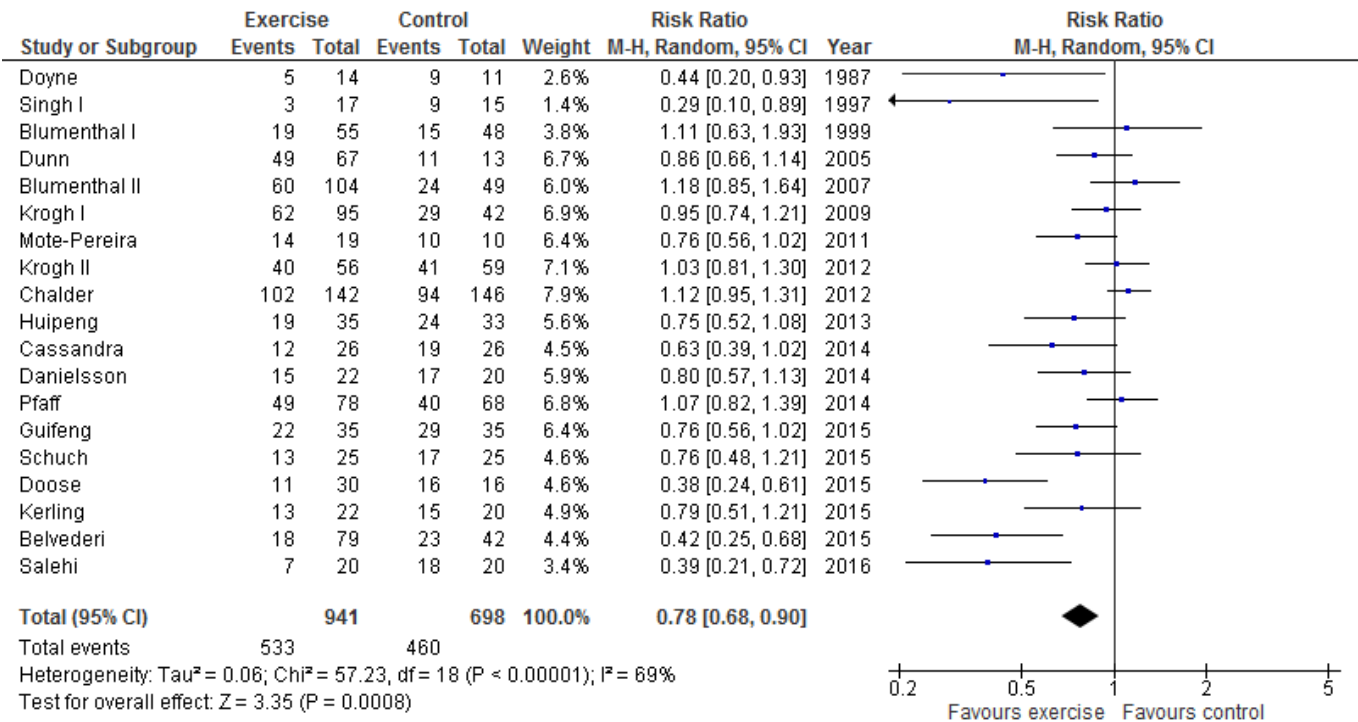

Supplement: inline-supplementary-material-8 [file inline-supplementary-material-8.pdf]
