# Supplementary material
Source: HighWire-hosted journal article supplement (https://bmjopen.bmj.com/content/7/9/e014820)
Supplement: inline-supplementary-material-9 [file inline-supplementary-material-9.pdf]

Article:

Exercise for patients with major depression: A systematic review with meta-analysis and trial sequential-analysis

**Supplementary Table**

**Table S3.** Heterogeneity of effect estimates for trials assessing the effect of exercise for patients diagnosed with depression on lack of remission.

| <b>Subgroups</b>                           | <b>Number of Trials (participants)</b> | <b>Random effects meta-analysis RR (95% CI., p, I<sup>2</sup>)</b> | <b>Subgroup explains heterogeneity P value</b> |
|--------------------------------------------|----------------------------------------|--------------------------------------------------------------------|------------------------------------------------|
| <b>Risk of bias</b>                        |                                        |                                                                    |                                                |
| Less than high risk of bias <sup>1,2</sup> | 2 (165)                                | 0.95 (0.74 to 1.23; p = 0.70; I <sup>2</sup> = 20%)                | 0.18                                           |
| High risk of bias                          | 17 (1474)                              | 0.77 (0.64 to 0.92; p = 0.003; I <sup>2</sup> = 75%)               |                                                |
| <b>Age</b>                                 |                                        |                                                                    |                                                |
| Old (>59 years)                            | 3 (299)                                | 0.61 (0.21 to 1.02; p = 0.37; I <sup>2</sup> = 91%)                | 0.62                                           |
| Young (<59 years)                          | 16 (1340)                              | 0.81 (0.70 to 0.93; p = 0.003; I <sup>2</sup> = 64%)               |                                                |
| <b>Exercise context</b>                    |                                        |                                                                    |                                                |
| Group exercise                             | 14 (1156)                              | 0.80 (0.66 to 0.96; p = 0.02; I <sup>2</sup> = 72%)                | 0.69                                           |
| Individual exercise                        | 5 (483)                                | 0.74 (0.52 to 1.04; p = 0.08; I <sup>2</sup> = 77%)                |                                                |
| <b>Duration</b>                            |                                        |                                                                    |                                                |
| Less than 10 weeks                         | 8 (393)                                | 0.63 (0.51 to 0.77; p < 0.001; I <sup>2</sup> = 40%)               | 0.004                                          |
| 10 weeks or more                           | 11 (1246)                              | 0.93 (0.78 to 1.10; p = 0.39; I <sup>2</sup> = 69%)                |                                                |
| <b>Attention control</b>                   |                                        |                                                                    |                                                |
| Attention control                          | 4 (364)                                | 0.91 (0.73 to 1.12; p = 0.38; I <sup>2</sup> = 42%)                | 0.07                                           |
| Waitlist                                   | 1 (25)                                 | 0.44 (0.21 to 0.93; p = 0.03; I <sup>2</sup> = 0%)                 |                                                |
| <b>Pharmacotherapy</b>                     |                                        |                                                                    |                                                |
| Add-on                                     | 7 (540)                                | 0.72 (0.54 to 0.96; p = 0.03; I <sup>2</sup> = 69%)                | 0.62                                           |
| No medication                              | 4 (252)                                | 0.75 (0.52 to 1.09; p = 0.13; I <sup>2</sup> = 66%)                |                                                |
| <b>Somatic comorbidity</b>                 |                                        |                                                                    |                                                |
| Somatic co-morbidity                       | 0                                      | N/A                                                                |                                                |
| No co-morbidity                            | 19 (1639)                              | N/A                                                                |                                                |
| <b>Minor depression</b>                    |                                        |                                                                    |                                                |
| Incl. minor depression                     | 3 (203)                                | 0.63 (0.21 to 1.89; p = 0.41; I <sup>2</sup> = 87%)                | 0.69                                           |
| No minor depression                        | 16 (1436)                              | 0.79 (0.68 to 0.92; p = 0.002; I <sup>2</sup> = 69%)               |                                                |
| <b>Patient setting</b>                     |                                        |                                                                    |                                                |
| Inpatients                                 | 6 (322)                                | 0.71 (0.60 to 0.84; p < 0.001; I <sup>2</sup> = 0%)                | 0.21                                           |
| Outpatients                                | 13 (1317)                              | 0.84 (0.69 to 1.01; p = 0.07; I <sup>2</sup> = 77%)                |                                                |
| <b>Trial size</b>                          |                                        |                                                                    |                                                |
| Trials n ≤ 52                              | 9 (358)                                | 0.62 (0.50 to 0.76; p < 0.001; I <sup>2</sup> = 45%)               | 0.002                                          |
| Trials n > 52                              | 10 (1281)                              | 0.95 (0.80 to 1.12; p = 0.52; I <sup>2</sup> = 68%)                |                                                |

<sup>1</sup>Trials potentially having less bias than trials with high risk of bias.
