# Supplementary material
Source: HighWire-hosted journal article supplement (https://bmjopen.bmj.com/content/7/9/e014820)

Article:

Exercise for patients with major depression: A systematic review with meta-analysis and trial sequential-analysis

**Supplementary Figure**

**Figure S6.** Trial Sequential Analysis and required information size for the effect of exercise on lack of remission.

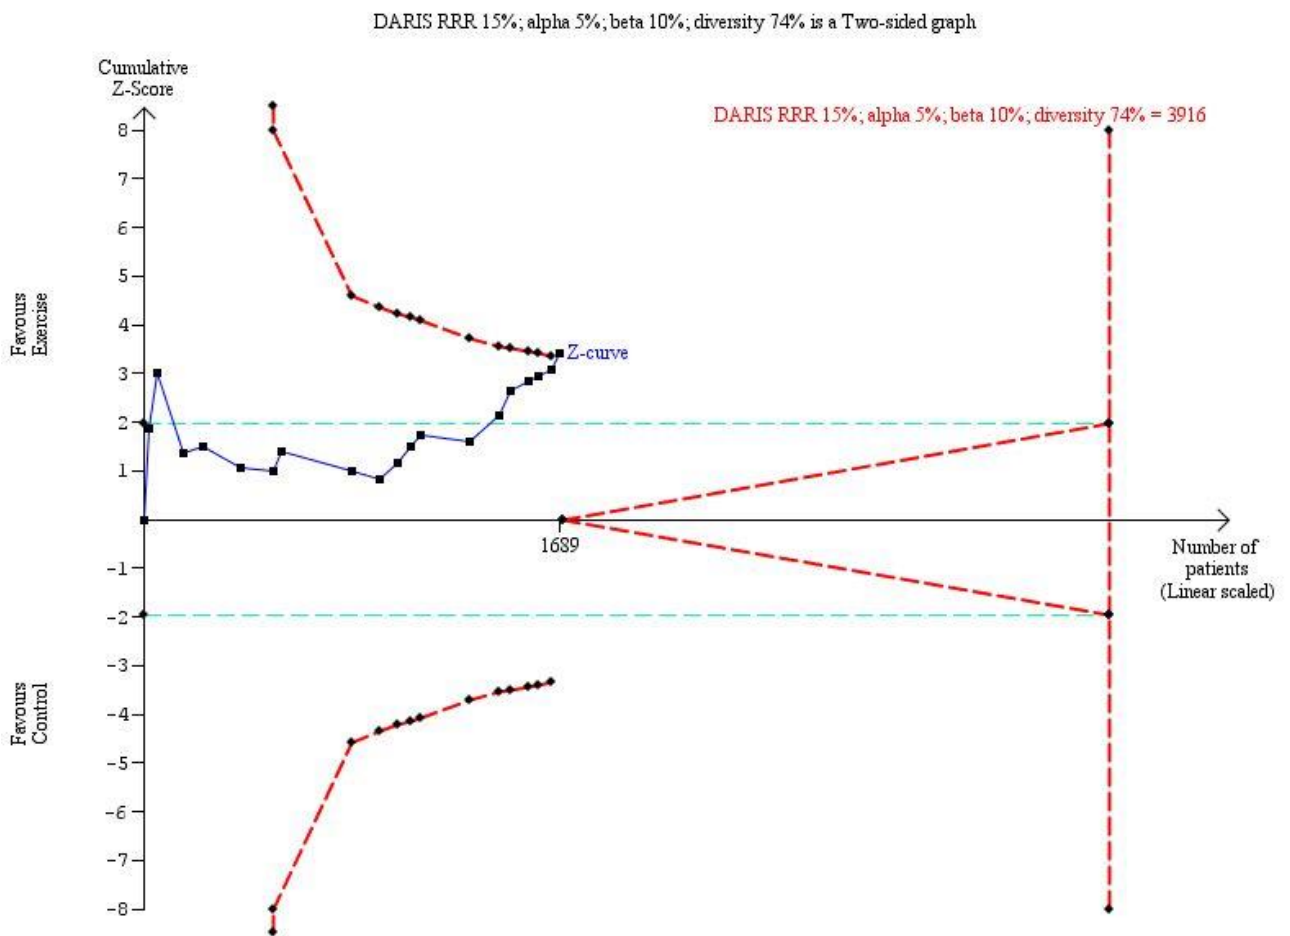

Supplement: inline-supplementary-material-10 [file inline-supplementary-material-10.pdf]
