# Supplementary material
Source: HighWire-hosted journal article supplement (https://bmjopen.bmj.com/content/7/9/e014820)

Article:

Exercise for patients with major depression: A systematic review with meta-analysis and trial sequential-analysis

Supplementary Figure S7

Figure S7. Effect of exercise on risk of serious adverse events for patients diagnosed with depression

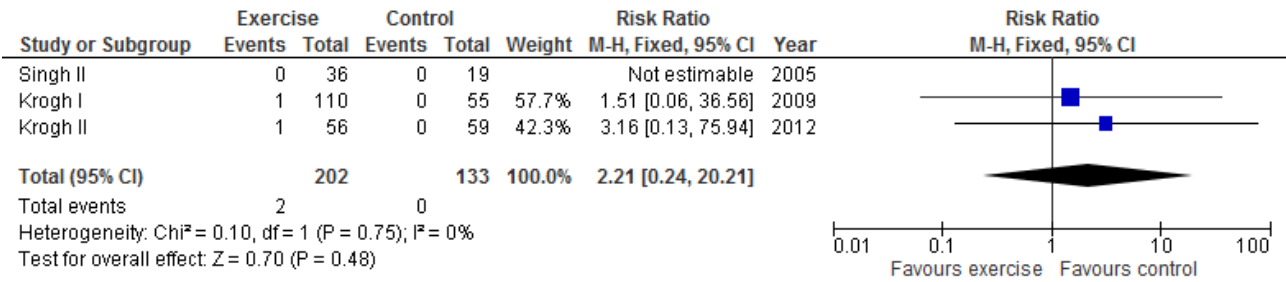

Supplement: inline-supplementary-material-11 [file inline-supplementary-material-11.pdf]
