# Supplementary material
Source: HighWire-hosted journal article supplement (https://bmjopen.bmj.com/content/7/9/e014820)

Article:

Exercise for patients with major depression: A systematic review with meta-analysis and trial sequential-analysis

### Supplementary Figure S8-S10

**Figure S8.** The effect of exercise on quality of life in patients diagnosed with depression

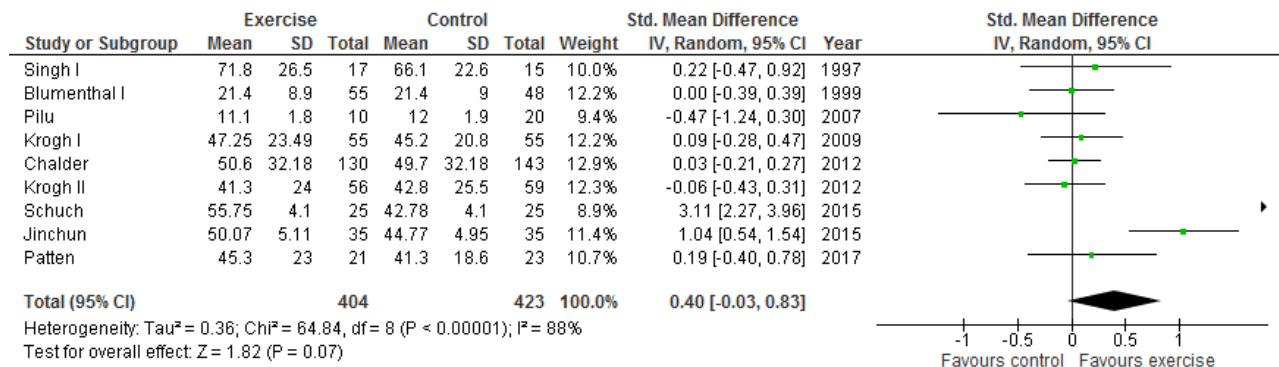

Quality of life was assessed using different scales: Singh I, Chalder and Patten used the SF-36, Blumenthal used Life Satisfaction Index, Pilu and Schuch used the WHOQOL, Krogh I and Krogh II used the WHO-Five Well-being Scale, and Jinchun used the GQOLI-74.

**Figure S9.** The effect of exercise on depression severity after the intervention in patients diagnosed with depression

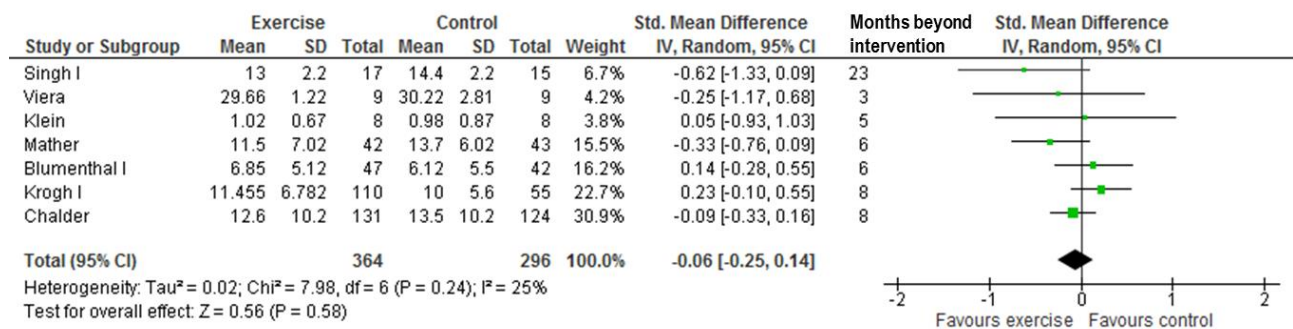

**Figure S10.** The effect of exercise on risk of lack of remission after the intervention in patients diagnosed with depression

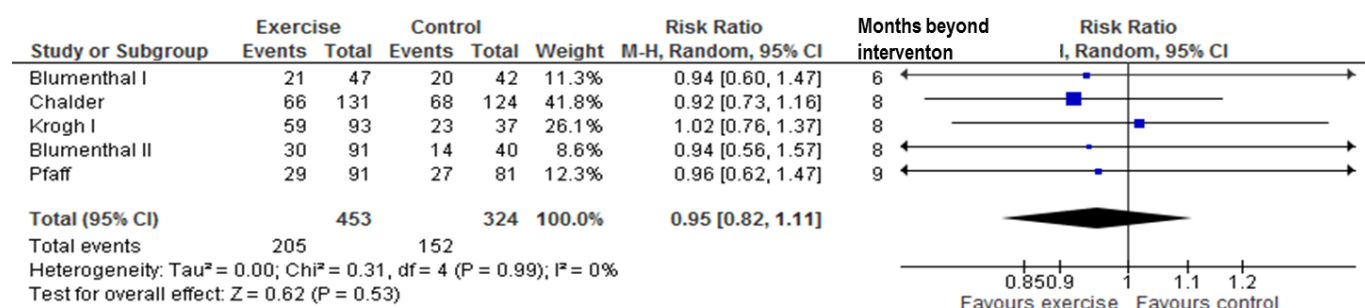

Supplement: inline-supplementary-material-12 [file inline-supplementary-material-12.pdf]
